# Supplementary material for: Inhibition of Wnt/β-catenin signaling suppresses myofibroblast differentiation of lung resident mesenchymal stem cells and pulmonary fibrosis
Source: PubMed Central journal article supplement (PMC6134002; doi:10.1038/s41598-018-28968-9), 2018-09-11
Supplement: 41598_2018_28968_MOESM1_ESM.pdf [file 41598_2018_28968_MOESM1_ESM.pdf]

**Inhibition of Wnt/ $\beta$ -catenin signaling suppresses myofibroblast differentiation of lung resident mesenchymal stem cells and pulmonary fibrosis.**

Honghui Cao<sup>1,2</sup>, Cong Wang<sup>3</sup>, Xiang Chen<sup>1,2</sup>, Jiwei Hou<sup>1,2</sup>, Zou Xiang<sup>4</sup>, Yi Shen<sup>5\*</sup> & Xiaodong Han<sup>1,2\*</sup>

1 Immunology and Reproduction Biology Laboratory & State Key Laboratory of Analytical Chemistry for Life Science, Medical School, Nanjing University, Nanjing, 210093, China.

2 Jiangsu Key Laboratory of Molecular Medicine, Nanjing University, Nanjing, 210093, China

3 State Key Laboratory of Natural Medicines and Jiangsu Key Laboratory of Drug Discovery for Metabolic Diseases, Center of New Drug Discovery, China Pharmaceutical University, 24 Tong Jia Xiang, Nanjing, 210009, China

4 Department of Health Technology and Informatics, Faculty of Health and Social Sciences, The Hong Kong Polytechnic University, Hung Hom, Kowloon, Hong Kong, China.

5 Department of Cardiothoracic Surgery, Jinling Hospital, Medical School of Nanjing University.

Mailing address: Immunology and Reproductive Biology Laboratory, Medical College of Nanjing University, Hankou Road 22, Nanjing, 210093, China

Department of Cardiothoracic Surgery, Jinling Hospital, Medical School of Nanjing University, 305 East Zhongshan Road, Nanjing, 210002, China.

**\*Corresponding author:** Yi Shen and Xiaodong Han

E-mail address: yishen305@126.com and hanxd@nju.edu.cn

Tel: +86-25-83686497

Fax: +86-25-83686497

## Supplementary File

Table 1. Sequence of mouse and human PCR primers used for Q-PCR.

| Genes           | Forward primer (5' to 3') | Reverse primer (5' to 3') |
|-----------------|---------------------------|---------------------------|
| Mouse           |                           |                           |
| Fibronectin     | TGTGACAACCTGCCGTAGACC     | GACCAACTGTCACCATTGAGG     |
| FSP-1           | GATGAGCAACTTGGACAGCA      | ATGTGCGAAGAAGCCAGAGT      |
| CTGF            | GTGTCTTCGGTGGGTCCGGTGTA   | TGGCTCGCATCATAGTTGGGT     |
| COL1 $\alpha$ 2 | GTCCTAGTCGATGGCTGCTC      | CAATGTCCAGAGGTGCAATG      |
| COL6 $\alpha$ 1 | TGCCAAGGACTTCATCATCA      | CTCCATTCCCCAGTGTGTTT      |
| GAPDH           | AACTTTGGCATTGTGGAAGG      | ACACATTGGGGTAGGAACA       |
| Human           |                           |                           |
| $\alpha$ -SMA   | ACCCACAATGTCCCATCTA       | GACAATCTCACGCTCAGCAG      |
| COL1 $\alpha$ 2 | GGCCCTCAAGGTTTCCAAGG      | CACCCTGTGGTCCAACAACCTC    |
| GAPDH           | AAATGCTGTTGAGCACGATG      | CTGTGCTGGATATCGCCTTT      |
